# Supplementary material for: Utilization of biomass pectin polymer to build high efficiency electrode architectures with sturdy construction and fast charge transfer structure to boost sodium storage performance for NASICON-type cathode
Source: Royal Society of Chemistry journal article supplement (doi:10.1039/c8ta10624j), 2018-12-21
Supplement: c8ta10624j1.pdf [file c8ta10624j1.pdf]

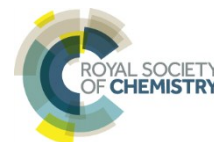

Journal Name

ARTICLE

Electronic Supporting Information

## Utilization of Biomass Pectin Polymer to Build High Efficient Electrode Architecture with Sturdy Construction and Fast Charge Transfer Structure to Boost Sodium Storage Performance for NASICON-type Cathode

Jing Zhao,<sup>a‡</sup> Xu Yang,<sup>b‡</sup> Yu Zhang,<sup>c</sup> Xian Jun Loh,<sup>\*d</sup> Xiaodong Hu,<sup>e</sup> Gang Chen,<sup>a</sup> Fei Du,<sup>\*a</sup> and Qingyu Yan<sup>\*c</sup>

<sup>a</sup>Key Laboratory of Physics and Technology for Advanced Batteries (Ministry of Education), College of Physics, Jilin University, Changchun, 130012, People's Republic of China

<sup>b</sup>State Key Laboratory of Rare Earth Resource Utilization, Changchun Institute of Applied Chemistry, Chinese Academy of Sciences, Changchun, 130022, People's Republic of China

<sup>c</sup>School of Materials Science and Engineering, Nanyang Technological University 50 Nanyang Avenue, Singapore 639798, Singapore

<sup>d</sup>Institute of Materials Research and Engineering A\*STAR (Agency for Science, Technology and Research)

<sup>e</sup>Department of Materials Engineering, University of British Columbia, Vancouver, Canada

\*Corresponding authors.

E-mail addresses: lohxj@imre.a-star.edu.sg (X. Loh), dufei@jlu.edu.cn (F. Du), Alexyan@ntu.edu.sg (Q. Yan).

‡These authors contributed equally to this work.

**Supplementary Figures**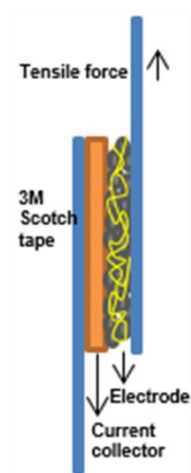

**Scheme 1** Illustration of tensile adhesion strength test.

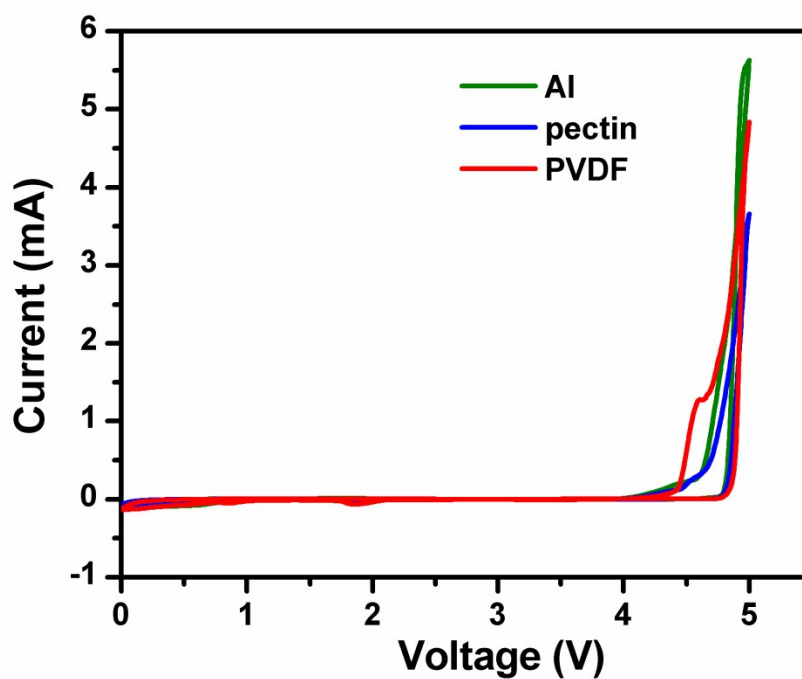

**Fig. S1** CV curves of pure pectin/PVDF films on Al foil and Al foil in half-cell configurations at a scan rate of  $0.2 \text{ mV s}^{-1}$ .

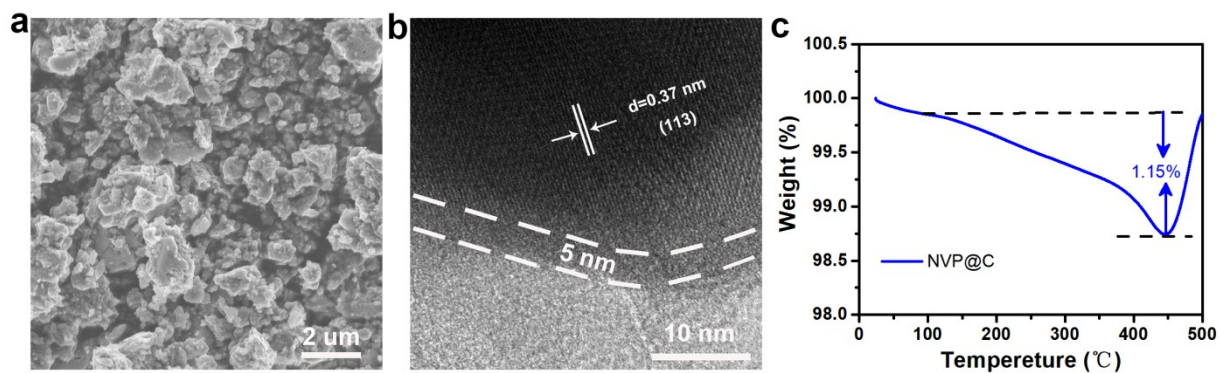

**Fig. S2** Morphological analysis of the NVP nanocomposite: (a) SEM image. (b) HRTEM image and (c) TG curve.

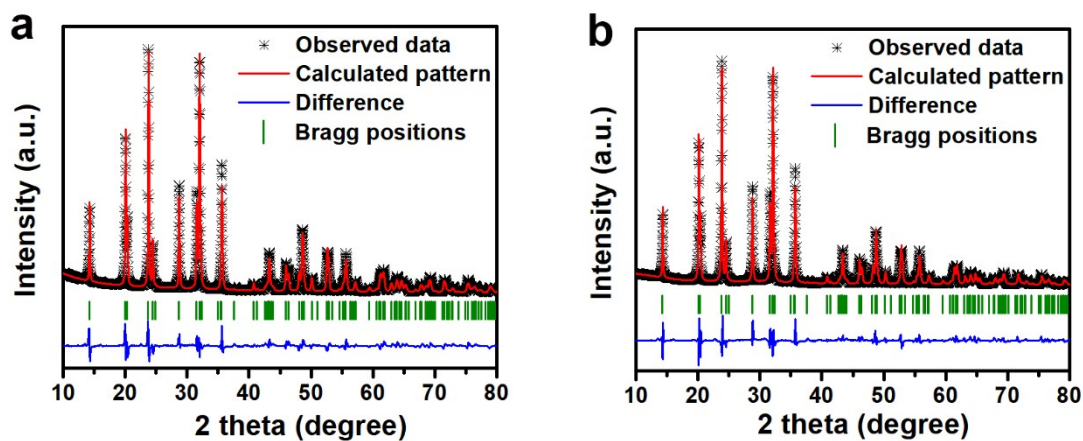

**Fig. S3** Rietveld refinement based on the powder X-ray diffraction pattern of (a) NVP nanocomposite and (b) after being soaked with pectin and water for 1 day.

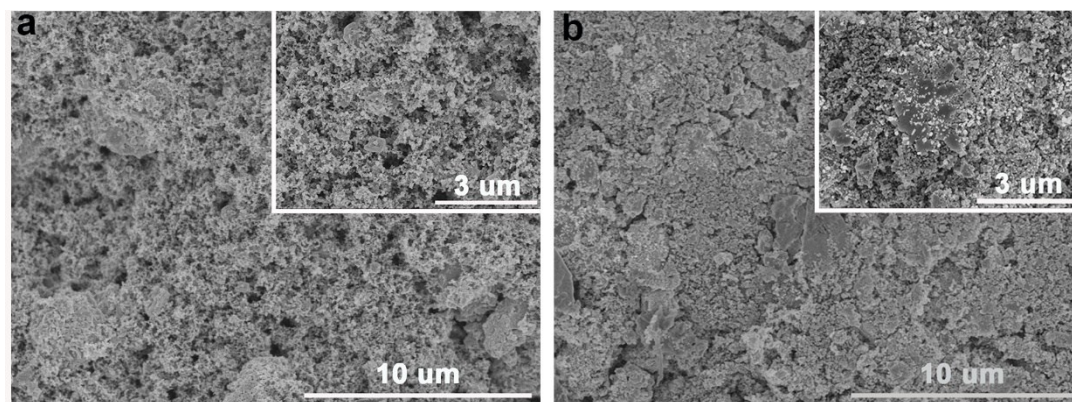

**Fig. S4** SEM images of (a) NVP-pectin and (b) NVP-PVDF electrode.

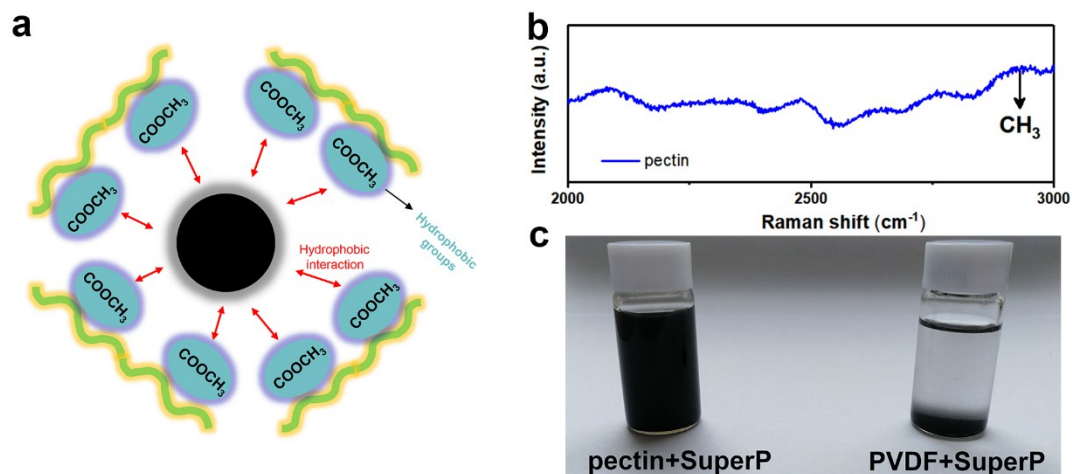

**Fig. S5** (a) Illustration of the interaction between pectin and Super P. (b) Raman spectrum of pectin powder. (c) Photos of pectin and PVDF binders mixed with Super P, showing the dispersal property of the pectin binder with Super P.

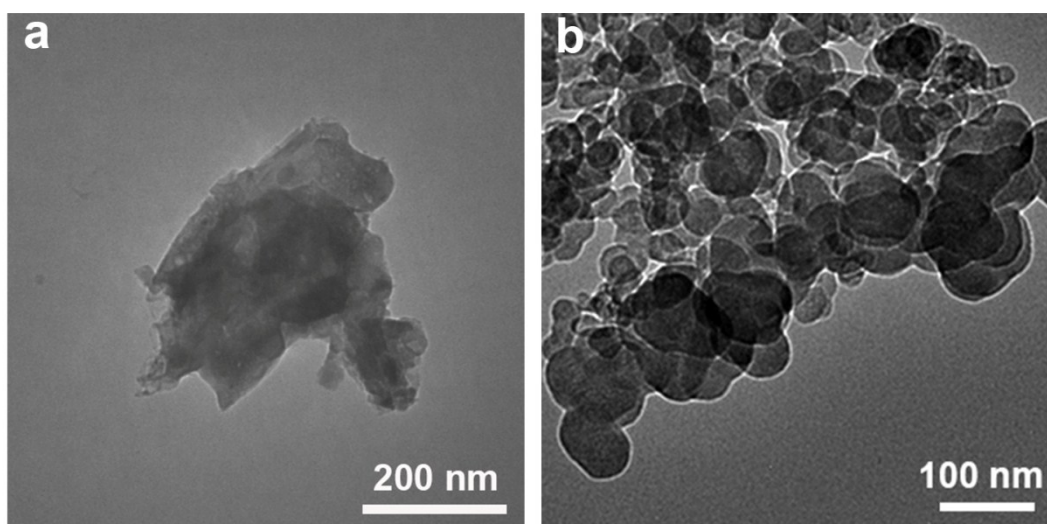

**Fig. S6** TEM images of (a) NVP and (b) Super P powders.

It could be seen from structural formula (Fig. 1a) that pectin is a chain polymer, which have the possibility of forming chain-like substance. Furthermore, it can be seen that morphology of NVP and Super P are far from chain-like. Considering that there are only three components in NVP-pectin and no chain-like material observed in NVP-PVDF electrode, the chain-like material in Fig. 2a could only be pectin.



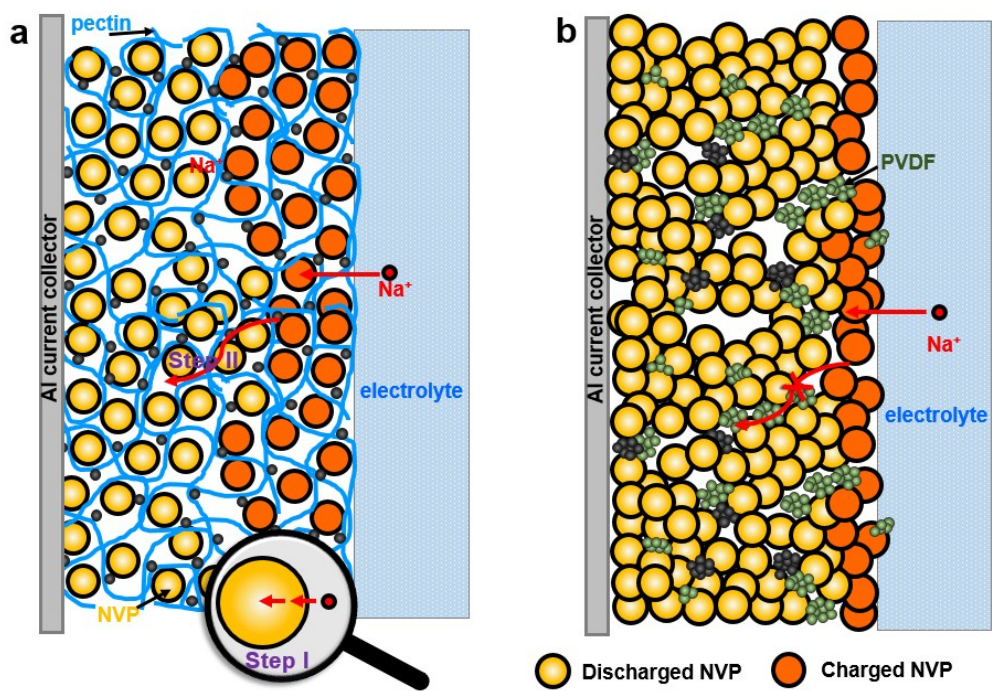

**Fig.S7** Illustration of electrochemical process for NVP-pectin and NVP-PVDF.

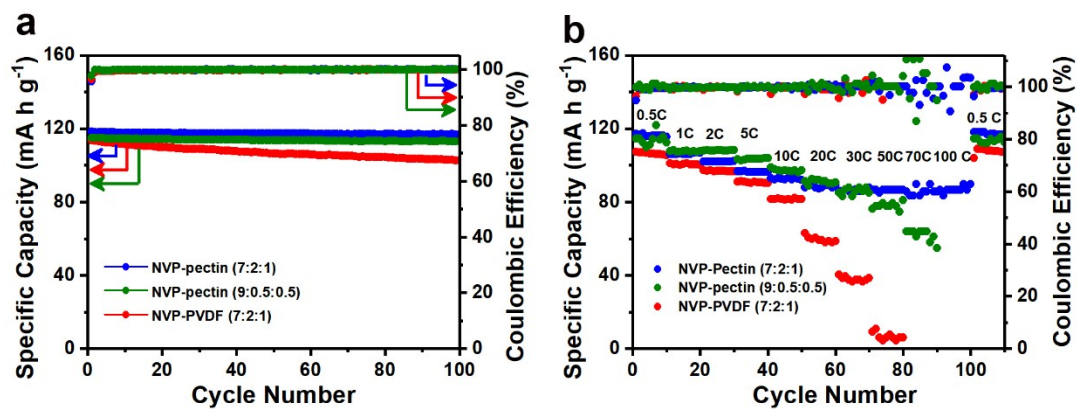

**Fig. S8** Electrochemical performance of NVP-pectin (9: 0.5: 0.5), NVP-pectin (7: 2: 1) and NVP-PVDF (7: 2: 1) (a) cycle performance and (b) rate performance.

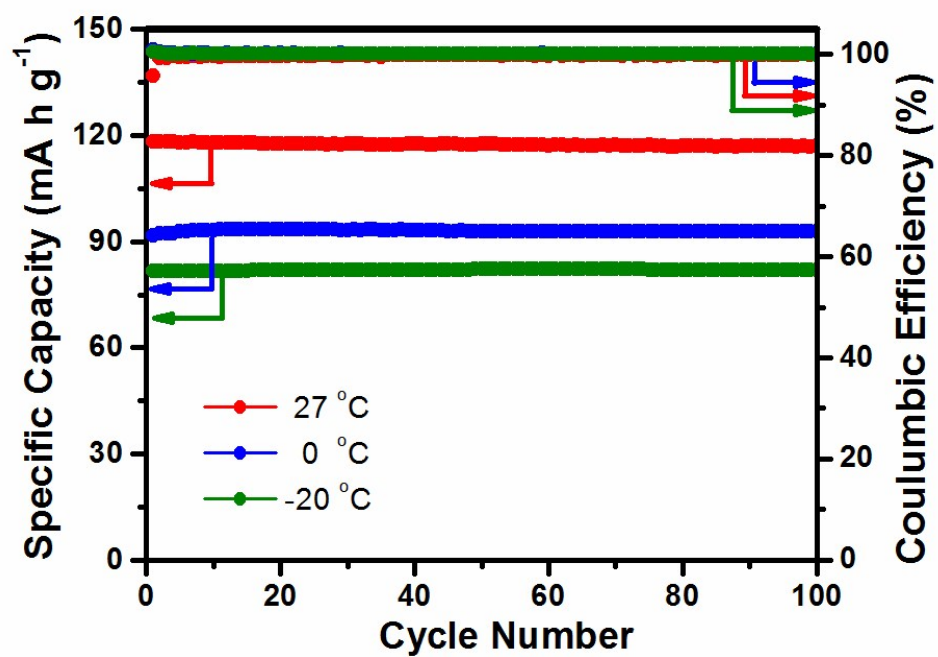

**Fig. S9** Cycle performance of NVP-pectin electrode at different temperature.

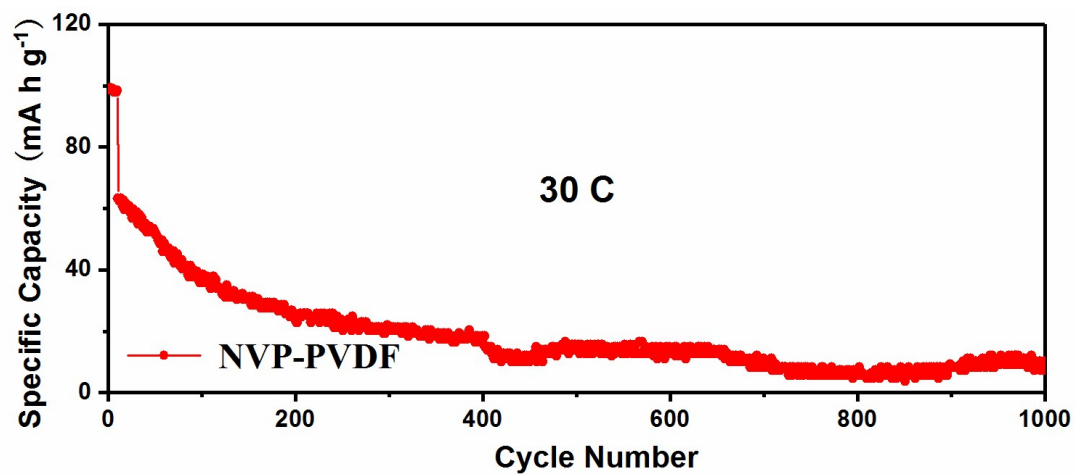

**Fig. S10** Long cycle performance of NVP-PVDF electrode at 30 C rate.

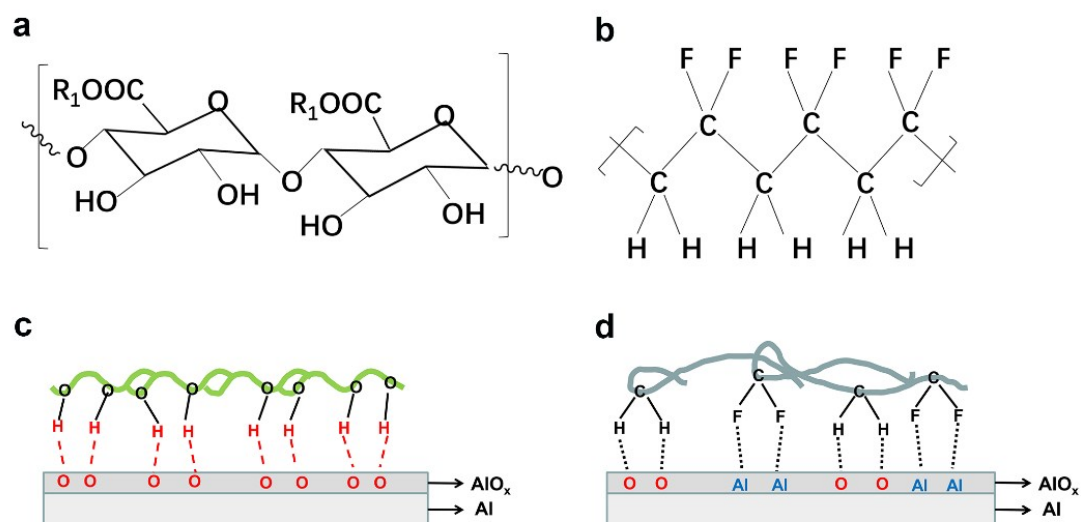

**Fig. S11** Chemical structures of (a) pectin and (b) PVDF. Corresponding binding mechanisms with current collector (c) pectin and (d) PVDF.

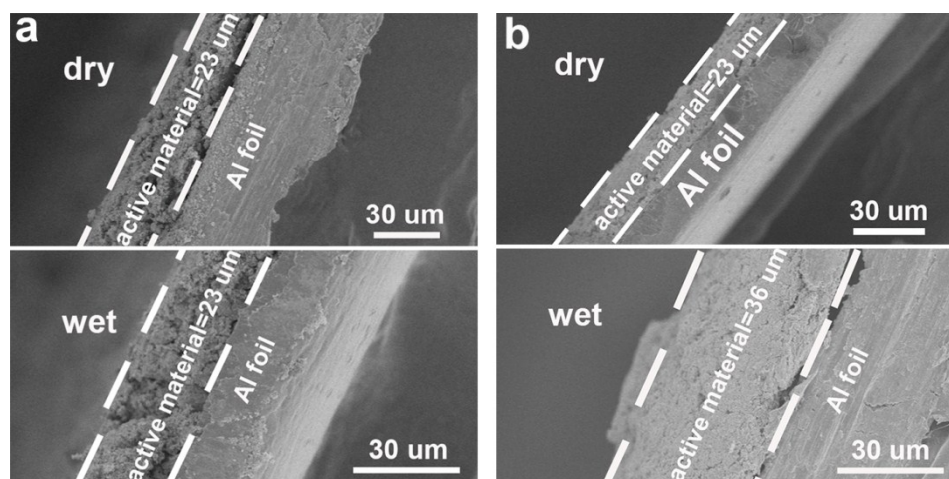

**Fig. S12** SEM images of cross sections of (a) NVP-pectin and (b) NVP-PVDF electrode at before and after being soaked in electrolyte.

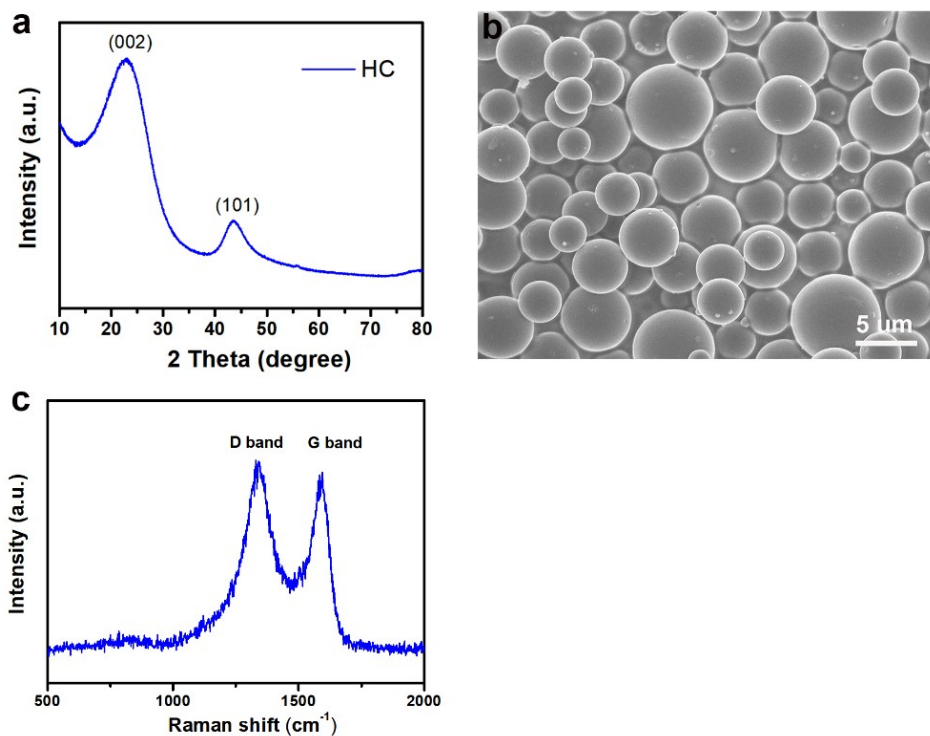

**Fig. S13** (a) X-ray diffraction pattern. (b) SEM image and (c) Raman spectrum of hard carbon.

In **Fig. S13a**, the observed (002) and (101) peaks exhibit a typical character of hard carbon. The size of hard carbon is at the range of 3~7 μm (**Fig. S13b**). Subsequently, the intensity of *D*-band in Raman spectrum is observed at 1349 cm<sup>-1</sup>, which corresponds to sp<sup>2</sup> carbon atoms with defects (**Fig. S13c**). And the *G*-band located at 1580 cm<sup>-1</sup> arises from planar sp<sup>2</sup> configured carbon atoms. The rich defects is beneficial for storage of sodium ions.

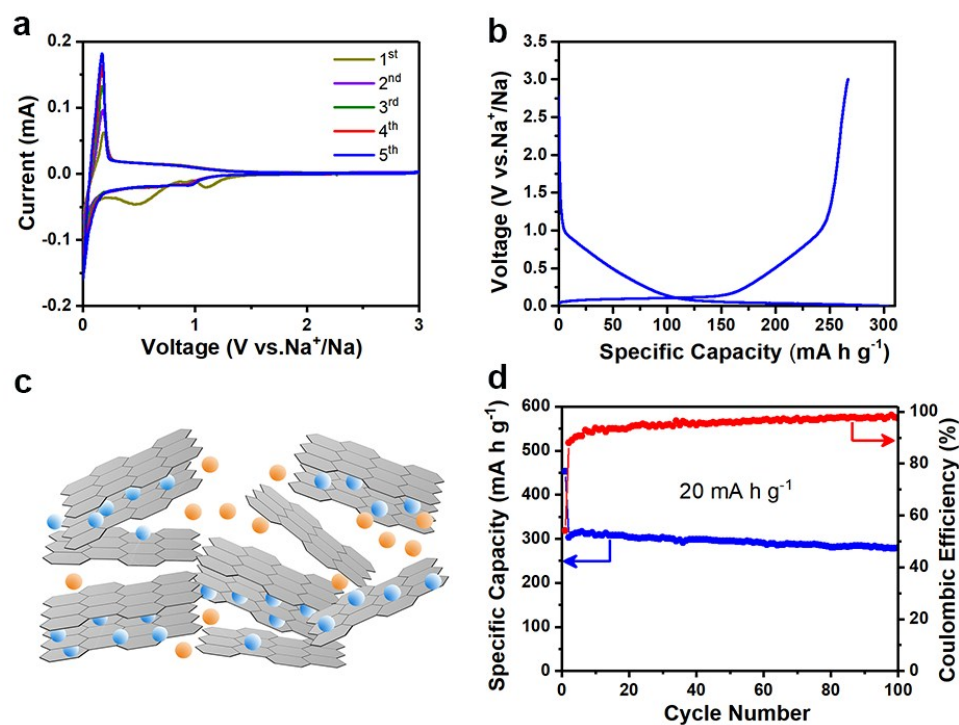

**Fig. S14** (a) CV profile and (b) stable discharge/charge profile of hard carbon. (c) Schematic of Na-ion storage mechanism and (d) cycle performance of hard carbon.



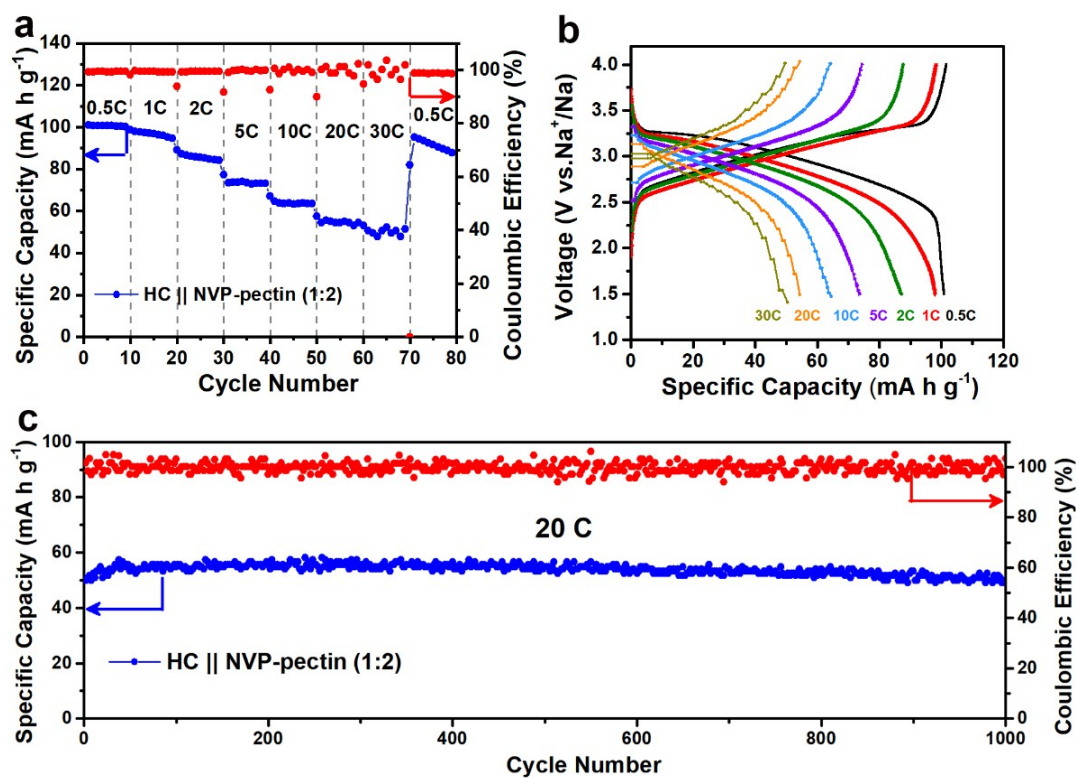

**Fig. S15** (a) Rate performance of HC || NVP (1: 2) full cell. (b) Corresponding charging/discharging profiles at various rates from 0.5 to 30 C and (c) long-term cycle performance at 20 C rate.

**Table S1** Lattice parameters of NVP and NVP (soak) from XRD calculations.

| Sample    | a (Å)    | b (Å)    | c (Å)     | Volume (Å <sup>3</sup> ) | R <sub>wp</sub> |
|-----------|----------|----------|-----------|--------------------------|-----------------|
| NVP       | 8.732(6) | 8.732(6) | 21.831(5) | 1441.8(2)                | 10.91           |
| NVP(soak) | 8.713(0) | 8.713(0) | 21.766(5) | 1431.0(6)                | 11.81           |

**Table S2** Calculated Na<sup>+</sup> diffusion coefficients of NVP-pectin and NVP-PVDF.

| $D_{Na}(\text{cm}^2\text{S}^{-1})$ | Anode                 | Cathode               |
|------------------------------------|-----------------------|-----------------------|
| NVP-pectin                         | $6.43 \times 10^{-9}$ | $4.03 \times 10^{-9}$ |
| NVP-PVDF                           | $1.32 \times 10^{-9}$ | $1.09 \times 10^{-9}$ |

**Table S3** A survey of electrochemical properties of  $\text{Na}_3\text{V}_2(\text{PO}_4)_3$  cathodes in sodium ion batteries.

| Electrode description       | Mass loading (mg cm <sup>-2</sup> ) | Carbon content (wt %) | Binder | Rate performance                                                         | Ref.      |
|-----------------------------|-------------------------------------|-----------------------|--------|--------------------------------------------------------------------------|-----------|
| NVP-pectin                  | 1.3 - 1.8                           | 1.15                  | pectin | 86.6 mA h g <sup>-1</sup> at 100 C                                       | This work |
| NVP-NFs                     | 1.2-1.4                             | 6.70                  | PVDF   | 75.9 mA h g <sup>-1</sup> at 200 C                                       | 1         |
| NVP@C@rGO                   | 0.8 - 1.0                           | 10.10                 | PVDF   | 86.0 mA h g <sup>-1</sup> at 100 C                                       | 2         |
| NVP:rGO-CNT                 | 0.5 - 1.0                           | 21.00                 | free   | 82.0 mA h g <sup>-1</sup> at 100 C                                       | 3         |
| NVP/AC                      | ~2.7                                | 8.46                  | PTFE   | 42.2 mA h g <sup>-1</sup> at 10 C                                        | 4         |
| HCF-NVP                     | ~1.0                                | 6.41                  | PVDF   | 78.0 mA h g <sup>-1</sup> at 100 C<br>38.0 mA h g <sup>-1</sup> at 500 C | 5         |
| (C@NVP)@pC                  | ~1.0                                | ~17.00                | PVDF   | 44.0 mA h g <sup>-1</sup> at 200 C                                       | 6         |
| NVP@C@CMK-3                 | -                                   | 17.88                 | PVDF   | 81.0 mA h g <sup>-1</sup> at 30 C                                        | 7         |
| NVP@rGO                     | 1.5 - 2.0                           | 3.50                  | PVDF   | 73.0 mA h g <sup>-1</sup> at 100 C<br>41.0 mA h g <sup>-1</sup> at 200 C | 8         |
| NVP-nanofiber               | 1.5 - 2.0                           | 6.50                  | PVDF   | 94.0 mA h g <sup>-1</sup> at 100 C                                       | 9         |
| 900-NVP@C/G                 | ~1.5                                | 18.34                 | PVDF   | 76.0 mA h g <sup>-1</sup> at 60 C                                        | 10        |
| NVP/C porous hollow spheres | -                                   | 7.50                  | PVDF   | 9.6 mA h g <sup>-1</sup> at 8.5 C                                        | 11        |
| NVP-CNF-6 h                 | ~1.9                                | 8.34                  | PVDF   | 88.9 mA h g <sup>-1</sup> at 50 C                                        | 12        |
| NVP@C                       | -                                   | 12.50                 | PVDF   | 94.9 mA h g <sup>-1</sup> at 5 C                                         | 13        |
| NVP@C-GF                    | ~0.9                                | 12.10                 | PVDF   | 83.0 mA h g <sup>-1</sup> at 100 C<br>56.0 mA h g <sup>-1</sup> at 200 C | 14        |
| NVP@C+N@CNTs                | 2.0 - 2.6                           | 12.68                 | PVDF   | 70.0 mA h g <sup>-1</sup> at 70 C                                        | 15        |
| NVP/C/rGO                   | 1.5 - 2.0                           | 4.34                  | PVDF   | 80.0 mA h g <sup>-1</sup> at 30 C                                        | 16        |
| NVP/MCNTs                   | ~1.8                                | 13.36                 | PVDF   | 70.0 mA h g <sup>-1</sup> at 10 C                                        | 17        |
| NVP/C                       | 1.9 - 2.5                           | 3.14                  | PVDF   | 92.0 mA h g <sup>-1</sup> at 5 C                                         | 18        |
| NVPC-800                    | -                                   | 7.60                  | PVDF   | 73.0 mA h g <sup>-1</sup> at 100 C<br>55.0 mA h g <sup>-1</sup> at 200 C | 19        |
| NVP/C-10                    | ~1.0                                | 3.38                  | PVDF   | 97.5 mA h g <sup>-1</sup> at 5 C                                         | 20        |
| PL-NVP@C                    | ~1.0                                | 5.93                  | PVDF   | 92.0 mA h g <sup>-1</sup> at 50 C                                        | 21        |
| NVP/C                       | 1.5 - 2.0                           | 17.60                 | PVDF   | 81.0 mA h g <sup>-1</sup> at 40 C                                        | 22        |
| NVP-graphene                | -                                   | 6.14                  | PVDF   | 70.1 mA h g <sup>-1</sup> at 30 C                                        | 23        |
| NVP/N-CNT                   | 2.5                                 | 6.57                  | PVDF   | 100.0 mA h g <sup>-1</sup> at 20 C                                       | 24        |

| Electrode description | Mass loading (mg cm <sup>-2</sup> ) | Carbon content (wt %) | Binder | Rate performance                   | Ref. |
|-----------------------|-------------------------------------|-----------------------|--------|------------------------------------|------|
| NVP@rGO               | ~1.5                                | 3.28                  | PVDF   | 79.2 mA h g <sup>-1</sup> at 100 C | 25   |
| NVP@C@HC              | 2.0                                 | 14.69                 | PVDF   | 61.0 mA h g <sup>-1</sup> at 50 C  | 26   |
| NVP/graphene          | ~1.0                                | 5.00                  | PVDF   | 60.4 mA h g <sup>-1</sup> at 30 C  | 27   |
| NVP nanoflakes        | -                                   | 10.53                 | PVDF   | 87.7 mA h g <sup>-1</sup> at 100 C | 28   |
| NVP/N-doped C         | -                                   | 20.25                 | PVDF   | 46.8 mA h g <sup>-1</sup> at 10 C  | 29   |
| NVP/C                 | -                                   | 2.80                  | PVDF   | 54.3 mA h g <sup>-1</sup> at 50 C  | 30   |

**Table S4** A survey of electrochemical properties of advanced sodium-ion full cells.

| Sodium-ion full cell description                                                                            | Voltage range (V) | Potential (V) | Current density (mA g <sup>-1</sup> ) | Capacity retention  | Ref.      |
|-------------------------------------------------------------------------------------------------------------|-------------------|---------------|---------------------------------------|---------------------|-----------|
| NVP  1M NaClO <sub>4</sub> /EC+PC+FEC  HC                                                                   | 1.5 - 4.0         | 3.2           | 2352                                  | 83.5% (1000 cycles) | This work |
| NVP  1M NaClO <sub>4</sub> /PC+FEC  HC                                                                      | 0.8 - 3.0         | 1.7           | 100                                   | -                   | 2         |
| NVP  1M NaFSI/PC  HC                                                                                        | 2.0 - 3.4         | 2.7           | 11.76                                 | -                   | 31        |
| NVP  1M NaClO <sub>4</sub> /EC +DMC  HC                                                                     | 2.0 - 4.0         | 3.3           | 59                                    | 58% (100 cycles)    | 32        |
| NVP  1M NaClO <sub>4</sub> /EC +DMC  HC                                                                     | 0.7 - 4.1         | 1.5           | 300                                   | 80% (1000 cycles)   | 33        |
| NVP  1M NaClO <sub>4</sub> /PC  HC                                                                          | 0.5 - 3.5         | 1.6           | 500                                   | 77.9% (50 cycles)   | 34        |
| NVP  1M NaClO <sub>4</sub> /EC+DMC  HC                                                                      | 2.0 - 3.5         | -             | 50                                    | 83% (50 cycles)     | 35        |
| NVP  1M NaClO <sub>4</sub> /EC+DMC  WC                                                                      | 2.0 - 3.4         | 2.8           | 60                                    | 95% (350 cycles)    | 36        |
| NaNi <sub>0.5</sub> Ti <sub>0.5</sub> O <sub>2</sub>   1 M NaClO <sub>4</sub> /PC  HC                       | 1.5 - 4.0         | 2.9           | 30                                    | 72% (100 cycles)    | 37        |
| NVP  1M NaClO <sub>4</sub> /PC+FEC  3D graphene                                                             | 0.7 - 3.7         | 2.7           | 100                                   | 77.1% (200 cycles)  | 1         |
| NVP  1M NaClO <sub>4</sub> /PC+FEC  NVP                                                                     | 1.0 - 2.2         | 1.7           | 1100                                  | 77% (100 cycles)    | 3         |
| NVP  1M NaClO <sub>4</sub> /EC+DMC  NVP                                                                     | 1.0 - 3.0         | 1.75          | 117.6                                 | 80% (200 cycles)    | 4         |
| NVP  1M NaClO <sub>4</sub> /EC+PC  NVP                                                                      | 0.8 - 2.0         | 1.7           | 117.6                                 | -                   | 38        |
| NVP  1M NaClO <sub>4</sub> /EC+DMC  NVP                                                                     | 1.0 - 2.5         | 1.8           | 235                                   | 81% (280 cycles)    | 39        |
| NVP  1M NaClO <sub>4</sub> /PC  NVP                                                                         | 1.0 - 2.2         | 1.7           | 235                                   | 81.4% (50 cycles)   | 13        |
| NaV <sub>2.91</sub> Mn <sub>0.09</sub> (PO <sub>4</sub> ) <sub>3</sub>   1M NaClO <sub>4</sub> /EC+DEC  NVP | 0.5 - 2.5         | 1.8           | 588                                   | 90.1% (300 cycles)  | 40        |
| NVP  1M NaClO <sub>4</sub> /PC  NVP                                                                         | 1.0 - 2.2         | 1.71          | 100                                   | 92% (100 cycles)    | 41        |
| NVP  1M NaClO <sub>4</sub> /EC+DMC  NaV <sub>3</sub> (PO <sub>4</sub> ) <sub>3</sub>                        | 0.5 - 3.5         | 1.8           | 588                                   | 87.2% (1000 cycles) | 42        |
| NVPF-NTP  1M NaClO <sub>4</sub> /EC+PC  Sb-CNT                                                              | 1.5 - 3.9         | 3.0           | 650                                   | 80% (50 cycles)     | 43        |
| NVP  1M NaClO <sub>4</sub> /EC+DMC  NTP                                                                     | 0.7 - 2.4         | 1.3           | 590                                   | 96.9% (300 cycles)  | 9         |
| NVPF  1M NaClO <sub>4</sub> /PC  NTP                                                                        | 1.0 - 1.8         | 1.5           | 65                                    | 80% (100 cycles)    | 44        |
| NVPF  1M NaClO <sub>4</sub> /EC+PC  NTP                                                                     | 1.0 - 3.0         | 1.5           | 128                                   | 74% (100 cycles)    | 45        |
| VOPO <sub>4</sub>   1M NaClO <sub>4</sub> /PC  NTP                                                          | 1.8 - 3.8         | 2.8           | 100                                   | 92.4% (100 cycles)  | 46        |
| NiCoFe  1M NaClO <sub>4</sub> /EC+DEC  NTP                                                                  | 0.5 - 2.2         | 1.4           | 150                                   | 100% (300 cycles)   | 47        |

| Sodium-ion full cell description                                                                                                                                                                       | Voltage range (V) | Potential (V) | Current density (mA g <sup>-1</sup> ) | Capacity retention | Ref. |
|--------------------------------------------------------------------------------------------------------------------------------------------------------------------------------------------------------|-------------------|---------------|---------------------------------------|--------------------|------|
| NVP  1M NaClO <sub>4</sub> /PC+FEC  Sb                                                                                                                                                                 | 1.7 - 3.4         | 2.7           | 117.6                                 | 100% (100 cycles)  | 48   |
| NVP  1M NaClO <sub>4</sub> /EC+PC  Sb                                                                                                                                                                  | 1.2 - 3.8         | 2.5           | 12                                    | -                  | 49   |
| NVP  1M NaClO <sub>4</sub> /PC+FEC  SnS                                                                                                                                                                | 0.8 - 3.0         | 2.2           | 1000                                  | 85.5% (300 cycles) | 50   |
| NVP  1M NaPF <sub>6</sub> /DME  Sn <sub>4</sub> P <sub>3</sub>                                                                                                                                         | 1.6 - 3.6         | 2.9           | 20                                    | -                  | 51   |
| NVP  1M NaClO <sub>4</sub> /PC+FEC  MoS <sub>2</sub>                                                                                                                                                   | 0.6 - 3.0         | 2.4           | 50                                    | -                  | 52   |
| NVP  1M NaClO <sub>4</sub> /EC+DEC  MoS <sub>3</sub>                                                                                                                                                   | 0.1 - 3.0         | 1.8           | 500                                   | 84% (100 cycles)   | 53   |
| Na(Ni <sub>0.5</sub> Mn <sub>0.5</sub> )O <sub>2</sub>   1M NaClO <sub>4</sub> /PC+FEC  Sn                                                                                                             | 1.5 - 4.0         | 2.8           | 24                                    | 74% (50 cycles)    | 54   |
| NVP  1M NaClO <sub>4</sub> /EC+DMC  Cu <sub>3</sub> P                                                                                                                                                  | 2.0 - 4.0         | 2.6           | 600                                   | 38.2% (200 cycles) | 55   |
| NVP  1M NaPF <sub>6</sub> /EC+DMC  HTO                                                                                                                                                                 | 1.8 - 3.8         | 2.7           | 200                                   | -                  | 56   |
| NVP  1M NaClO <sub>4</sub> /EC+PC  SPO                                                                                                                                                                 | 1.5 - 4.0         | 2.9           | 50                                    | 99.8% (100 cycles) | 57   |
| NVP  1M NaClO <sub>4</sub> /EC+PC  MoO <sub>3</sub>                                                                                                                                                    | 0.2 - 3.0         | 1.4           | 111.7                                 | -                  | 58   |
| NVP  1M NaClO <sub>4</sub> /EC+DEC  TiO <sub>2</sub>                                                                                                                                                   | 1.0 - 4.0         | 2.2           | 24                                    | -                  | 59   |
| NVOPF  1M NaClO <sub>4</sub> /EC+PC  VO <sub>2</sub>                                                                                                                                                   | 1.0 - 4.0         | 2.0           | 520                                   | 80% (220 cycles)   | 60   |
| NVP  1M NaCF <sub>3</sub> SO <sub>3</sub> /DEGDME  CoSe <sub>2</sub>                                                                                                                                   | 0.5 - 3.0         | 1.2           | 500                                   | 97.9% (50 cycles)  | 61   |
| NVP  1M NaClO <sub>4</sub> /PC  Co <sub>0.5</sub> Fe <sub>0.5</sub> S <sub>2</sub>                                                                                                                     | 0.7 - 2.7         | 1.6           | 200                                   | 87% (100 cycles)   | 62   |
| NVP  1M NaClO <sub>4</sub> /PC+FEC  NiFe <sub>2</sub> O <sub>4</sub>                                                                                                                                   | 0.0 - 4.0         | 1.8           | 59                                    | 95% (30 cycles)    | 63   |
| Na <sub>3</sub> V <sub>1.8</sub> Al <sub>0.2</sub> (PO <sub>4</sub> ) <sub>3</sub>   1M NaPF <sub>6</sub> /EC+DEC  Na <sub>3</sub> Ti <sub>1.8</sub> Fe <sub>0.2</sub> (PO <sub>4</sub> ) <sub>3</sub> | 0.4 - 2.0         | 1.2           | 59                                    | -                  | 64   |
| Na <sub>2/3</sub> Ni <sub>1/3</sub> Mn <sub>2/3</sub> O <sub>2</sub>   1M NaClO <sub>4</sub> /EC+PC  Sb                                                                                                | 1.4 - 4.0         | 2.8           | 500                                   | 70% (100 cycles)   | 65   |
| [Ni <sub>0.6</sub> Co <sub>0.2</sub> Mn <sub>0.2</sub> ]O <sub>2</sub> @Al <sub>2</sub> O <sub>3</sub>   0.5M NaPF <sub>6</sub> /PC+FEC  HC                                                            | 1.0 - 4.1         | 2.5           | 75                                    | 75% (300 cycles)   | 66   |
| Na <sub>0.80</sub> Li <sub>0.12</sub> Ni <sub>0.22</sub> Mn <sub>0.66</sub> O <sub>2</sub>   1M NaPF <sub>6</sub> /EC+DEC  SnS <sub>2</sub>                                                            | 1.0 - 4.2         | 2.5           | 37                                    | 74% (50 cycles)    | 67   |
| Na <sub>0.8</sub> Ni <sub>0.4</sub> Ti <sub>0.6</sub> O <sub>2</sub>   1M NaPF <sub>6</sub> /EC+DEC  Na <sub>0.3</sub> MoO <sub>2</sub>                                                                | 0.6 - 3.6         | 2.1           | 20                                    | 94.8% (100 cycles) | 68   |
| Na <sub>x</sub> Fe <sub>2</sub> (CN) <sub>6</sub>   1M NaClO <sub>4</sub> /EC+DEC  CNT/FeO <sub>x</sub>                                                                                                | 0.5 - 3.0         | 1.7           | 250                                   | 85% (400 cycles)   | 69   |
| PB  1M NaClO <sub>4</sub> /EC+DMC  NACF                                                                                                                                                                | 0.01 - 3.5        | -             | 100                                   | -                  | 70   |

**References:**

1. X. Cao, A. Pan, S. Liu, J. Zhou, S. Li, G. Cao, J. Liu, S. Liang, *Adv. Energy Mater.*, 2017, **7**, 1700797.
2. X. Rui, W. Sun, C. Wu, Y. Yu, Q. Yan, *Adv. Mater.*, 2015, **27**, 6670.
3. C. Zhu, P. Kopold, P. A. van Aken, J. Maier, Yu, Y., *Adv. Mater.*, 2016, **28**, 2409.
4. S. Li, Y. Dong, L. Xu, X. Xu, L. He, L. Mai, *Adv. Mater.*, 2014, **26**, 3545.
5. Y. Fang, L. Xiao, X. Ai, Y. Cao, H. Yang, *Adv. Mater.*, 2015, **27**, 5895.
6. C. Zhu, K. Song, P. A. van Aken, J. Maier, Y. Yu, *Nano Lett.*, 2014, **14**, 2175.
7. Y. Jiang, Z. Yang, W. Li, L. Zeng, F. Pan, M. Wang, X. Wei, G. Hu, L. Gu, Y. Yu, *Adv. Energy Mater.*, 2015, **5**, 1402104.
8. Y. Xu, Q. Wei, C. Xu, Q. Li, Q. An, P. Zhang, J. Sheng, L. Zhou, L. Mai, *Adv. Energy Mater.*, 2016, **6**, 1600389.
9. W. Ren, Z. Zheng, C. Xu, C. Niu, Q. Wei, Q. An, K. Zhao, M. Yan, M. Qin, L. Mai, *Nano Energy*, 2016, **25**, 145.
10. J. Fang, S. Wang, Z. Li, H. Chen, L. Xia, L. Ding, H. Wang, *J. Mater. Chem. A*, 2016, **4**, 1180.
11. J. Mao, C. Luo, T. Gao, X. Fan, C. Wang, *J. Mater. Chem. A*, 2015, **3**, 10378.
12. J. Yang, D.-W. Han, M. R. Jo, K. Song, Y.-I. Kim, S.-L. Chou, H.-K. Liu, Y.-M. Kang, *J. Mater. Chem. A*, 2015, **3**, 1005.
13. W. Duan, Z. Zhu, H. Li, Z. Hu, K. Zhang, F. Cheng, J. Chen, *J. Mater. Chem. A*, 2014, **2**, 8668.
14. X. Zhong, Z. Yang, Y. Jiang, W. Li, L. Gu, Y. Yu, *ACS Appl. Mat. Interfaces*, 2016, **8**, 32360.
15. W. Shen, H. Li, Z. Guo, C. Wang, Z. Li, Q. Xu, H. Liu, Y. Wang, Y. Xia, *ACS Appl. Mat. Interfaces*, 2016, **8**, 15341.
16. J. Z. Guo, X. L. Wu, F. Wan, J. Wang, X. H. Zhang, R. S. Wang, *Chem. Eur. J.*, 2015, **21**, 17371.
17. S. Tao, P. Cui, W. Huang, Z. Yu, X. Wang, S. Wei, D. Liu, L. Song, W. Chu, *Carbon*, 2016, **96**, 1028.
18. W. Shen, C. Wang, H. Liu, W. Yang, *Chem. Eur. J.*, 2013, **19**, 14712.



19. S. Li, P. Ge, C. Zhang, W. Sun, H. Hou, X. Ji, *J. Power Sources*, 2017, **366**, 249.
20. Y.-X. Zhou, L.-L. Zhang, X.-L. Yang, Y.-H. Huang, X.-K. Ding, D. Ma, J.-Q. Wang, *Ceramics International*, 2017, **43**, 2333.
21. E. Wang, W. Xiang, R. Rajagopalan, Z. Wu, J. Yang, M. Chen, B. Zhong, S. X. Dou, S. Chou, X. Guo, Y.-M. Kang, *J. Mater. Chem. A*, 2017, **5**, 9833.
22. P. Feng, W. Wang, K. Wang, S. Cheng, K. Jiang, *J. Mater. Chem. A*, 2017, **5**, 10261.
23. S. Tao, X. Wang, P. Cui, Y. Wang, Y. A. Haleem, S. Wei, W. Huang, L. Song, W. Chu, *Rsc Adv.*, 2016, **6**, 43591.
24. H. Zhang, I. Hasa, B. Qin, T. Diemant, D. Buchholz, R. J. Behm, S. Passerini, *ChemElectroChem*, 2017, **4**, 1256.
25. F. Li, Y.-E. Zhu, J. Sheng, L. Yang, Y. Zhang, Z. Zhou, *J. Mater. Chem. A*, 2017, **5**, 25276.
26. L. Chen, Y. Zhao, S. Liu, L. Zhao, *ACS Appl. Mat. Interfaces*, 2017, **9**, 44485.
27. Y. H. Jung, C. H. Lim, D. K. Kim, *J. Mater. Chem. A*, 2013, **1**, 11350.
28. Y. Zhao, X. Cao, G. Fang, Y. Wang, H. Yang, S. Liang, A. Pan, G. Cao, *Chemical Engineering Journal*, 2018, **339**, 162.
29. P. Nie, Y. Zhu, L. Shen, G. Pang, G. Xu, S. Dong, H. Dou, X. Zhang, *J. Mater. Chem. A*, 2014, **2**, 18606.
30. Q. Zhang, W. Wang, Y. Wang, P. Feng, K. Wang, S. Cheng, K. Jiang, *NanoEnergy*, 2016, **20**, 11.
- 31 Z. Jian, W. Han, X. Lu, H. Yang, Y.-S. Hu, J. Zhou, Z. Zhou, J. Li, W. Chen, D. Chen, L. Chen, *Adv. Energy Mater.*, 2013, **3**, 156.
32. W. Ren, X. Yao, C. Niu, Z. Zheng, K. Zhao, Q. An, Q. Wei, M. Yan, L. Zhang, L. Mai, *Nano Energy*, 2016, **28**, 216.
33. T. Yang, X. Niu, T. Qian, X. Shen, J. Zhou, N. Xu, C. Yan, *Nanoscale*, 2016, **8**, 15497.
34. Z. Yuan, L. Si, X. Zhu, *J. Mater. Chem. A*, 2015, **3**, 23403.

35. B. Xiao, F. A. Soto, M. Gu, K. S. Han, J. Song, H. Wang, M. H. Engelhard, V. Murugesan, K. T. Mueller, D. Reed, V. L. Sprenkle, P. B. Balbuena, X. Li, *Adv. Energy Mater.*, 2018, 1801441. <https://doi.org/10.1002/aenm.201801441>.
36. F. Shen, W. Luo, J. Dai, Y. Yao, M. Zhu, E. Hitz, Y. Tang, Y. Chen, V. L. Sprenkle, X. Li, L. Hu, *Adv. Energy Mater.*, 2016, **6**, 1600377.
37. H. Wang, Y. Xiao, C. Sun, C. Lai, X. Ai, *Rsc Adv.*, 2015, **5**, 106519.
38. K. Saravanan, C. W. Mason, A. Rudola, K. H. Wong, P. Balaya, *Adv. Energy Mater.*, 2013, **3**, 444.
39. Y. Zhang, H. Zhao, Y. Du, *J. Mater. Chem. A*, 2016, **4**, 7155.
40. X. Ou, X. Liang, C. Yang, H. Dai, F. Zheng, P. Wu, Q. Pan, X. Xiong, M. Liu, *Energy Storage Materials*, 2018, **12**, 153.
41. T. F. Hung, W. J. Cheng, W. S. Chang, C. C. Yang, C. C. Shen, Y. L. Kuo, *Chem. Eur. J.*, 2016, **22**, 10620.
42. P. Hu, X. Wang, J. Ma, Z. Zhang, J. He, X. Wang, S. Shi, G. Cui, L. Chen, *Nano Energy*, 2016, **26**, 382.
43. J. Z. Guo, P. F. Wang, X. L. Wu, X. H. Zhang, Q. Yan, H. Chen, J. P. Zhang, Y. G. Guo, *Adv. Mater.*, 2017, **29**, 1701968.
44. P. R. Kumar, Y. H. Jung, J. E. Wang, D. K. Kim, *J. Power Sources*, 2016, **324**, 421.
45. Q. Liu, X. Meng, Z. Wei, D. Wang, Y. Gao, Y. Wei, F. Du, G. Chen, *ACS Appl. Mat. Interfaces*, 2016, **8**, 31709.
46. Y. Liu, Y. Qiao, X. Lou, X. Zhang, W. Zhang, Y. Huang, *ACS Appl. Mat. Interfaces*, 2016, **8**, 14564.
47. J. Peng, J. Wang, H. Yi, W. Hu, Y. Yu, J. Yin, Y. Shen, Y. Liu, J. Luo, Y. Xu, P. Wei, Y. Li, Y. Jin, Y. Ding, L. Miao, J. Jiang, J. Han, Y. Huang, *Adv. Energy Mater.*, 2018, **8**, 1702856.
48. H. Gao, W. Zhou, K. Park, J. B. Goodenough, *Adv. Energy Mater.*, 2016, **6**, 1600467.
49. K.-C. Huang, J.-Z. Guo, H.-H. Li, H.-H. Fan, D.-H. Liu, Y.-P. Zheng, W.-L. Li, X.-L. Wu, J.-P. Zhang, *Journal of Alloys and Compounds*, 2018, **731**, 881.

50. X. Xiong, C. Yang, G. Wang, Y. Lin, X. Ou, J.-H. Wang, B. Zhao, M. Liu, Z. Lin, K. Huang, *Energy Environ. Sci.*, 2017, **10**, 1757.
51. X. Fan, T. Gao, C. Luo, F. Wang, J. Hu, C. Wang, *Nano Energy*, 2017, **38**, 350.
52. P. Li, J. Y. Jeong, B. Jin, K. Zhang, J. H. Park, *Adv. Energy Mater.*, 2018, **8**, 1703300.
53. H. Ye, L. Wang, S. Deng, X. Zeng, K. Nie, P. N. Duchesne, B. Wang, S. Liu, J. Zhou, F. Zhao, N. Han, P. Zhang, J. Zhong, X. Sun, Y. Li, Y. Li, J. Lu, *Adv. Energy Mater.*, 2017, **7**, 1601602.
54. S. M. Oh, S. T. Myung, M. W. Jang, B. Scrosati, J. Hassoun, Y. K. Sun, *Phys. Chem. Chem. Phys.*, 2013, **15**, 3827.
55. M. Fan, Y. Chen, Y. Xie, T. Yang, X. Shen, N. Xu, H. Yu, C. Yan, *Adv. Funct. Mater.*, 2016, **26**, 5019.
56. L. Que, F. Yu, L. Zheng, Z.-B. Wang, D. Gu, *Nano Energy*, 2018, **45**, 337.
57. X. Yang, R.-Y. Zhang, J. Zhao, Z.-X. Wei, D.-X. Wang, X.-F. Bie, Y. Gao, J. Wang, F. Du, G. Chen, *Adv. Energy Mater.*, 2018, **8**, 1701827.
58. S. Hariharan, K. Saravanan, P. Balaya, *Electrochemistry Communications*, 2013, **31**, 5.
59. J. Ni, S. Fu, Y. Yuan, L. Ma, Y. Jiang, L. Li, J. Lu, *Adv. Mater.*, 2018, **30**, 1704337.
60. D. Chao, C.-H. M. Lai, P. Liang, Q. Wei, Y.-S. Wang, C. R. Zhu, G. Deng, V. V. T. Doan-Nguyen, J. Lin, L. Mai, H. J. Fan, B. Dunn, Z. X. Shen, *Adv. Energy Mater.*, 2018, **8**, 1800058.
61. K. Zhang, M. Park, L. Zhou, G.-H. Lee, W. Li, Y.-M. Kang, J. Chen, *Adv. Funct. Mater.*, 2016, **26**, 6728.
62. K. Zhang, M. Park, L. Zhou, G. H. Lee, J. Shin, Z. Hu, S. L. Chou, J. Chen, Y. M. Kang, *Angew. Chem. Int. Ed.*, 2016, **55**, 12822.
63. M. C. Lopez, M. J. Aragon, G. F. Ortiz, P. Lavela, R. Alcantara, J. L. Tirado, *Chem. Eur. J.*, 2015, **21**, 14879.
64. M. J. Aragón, P. Lavela, R. Alcántara, J. L. Tirado, *Electrochimica Acta*, 2015, **180**, 824.
65. L. Liang, Y. Xu, Y. Li, H. Dong, M. Zhou, H. Zhao, U. Kaiser, Y. Lei, *J. Mater. Chem. A*, 2017, **5**, 1749.

66. J.-Y. Hwang, S.-T. Myung, J. U. Choi, C. S. Yoon, H. Yashiro, Y.-K. Sun, *J. Mater. Chem. A*, 2017, **5**, 23671.
67. B. Qu, C. Ma, G. Ji, C. Xu, J. Xu, Y. S. Meng, T. Wang, J. Y. Lee, *Adv. Mater.*, 2014, **26**, 3854.
68. K. Zhu, S. Guo, J. Yi, S. Bai, Y. Wei, G. Chen, H. Zhou, *J. Mater. Chem. A*, 2015, **3**, 22012.
69. H. L. Ye, Y. Y. Wang, F. P. Zhao, W. J. Huang, N. Han, J. H. Zhou, M. Zeng, Y. G. Li, *J. Mater. Chem. A*, 2016, **4**, 1754.
70. R. Hao, Y. Yang, H. Wang, B. Jia, G. Ma, D. Yu, L. Guo, S. Yang, *Nano Energy*, 2018, **45**, 220.
